# Supplementary material for: Velocity of magnetic holes in the solar wind from cluster multipoint measurements
Source: Copernicus journal article supplement (doi:10.5194/angeo-2023-5), 2023-02-24
Supplement: Supplementary file [file angeo-2023-5-AC2-supplement.pdf]

## Response reviewer 2

Firstly, we would like to thank the reviewer for useful comments and feedback. Below you can find the comments with our response in red.

This manuscript considers the dynamics and propagation velocity of magnetic holes observed in the solar wind. Magnetic holes are now common structures in space and heliospheric plasmas. They have been observed within the magnetosheath, magnetotail, and in the solar wind upstream of Earth and other planets. They have also been detected to accompany switchback events at small heliocentric distances. As such, these structures have high scientific importance for plasma heating and the dynamics of the solar wind plasma. This manuscript is well-written and has taken an interesting approach to perform a statistical study of these structures through using data from the Cluster mission collected during an early phase of the mission.

However, there are aspects in this work that need further consideration and improvement, and the paper has the potential to make important contributions after additional work and resubmission. These points are listed below:

The authors track the minimum magnetic field point to estimate the velocity of the structures. Tsurutani et al. (2011, cited in the manuscript) suggested that magnetic depressions (or magnetic holes) can change in size as they propagate. Particularly, rotational holes that are created as a result of reconnection in the solar wind can be very dynamic. Once the reconnection begins, it can continue to evolve for long periods and internal structures of the reconnection process can continuously change the boundary and the pressure balance. Yao et al. (2020, not cited) also showed that the magnetic dips can be expanding or contracting. Have the authors considered the possibility of contracting and/or expanding structures?

It is unlikely that the MHs will change considerably on these time scales, see Figure 3. In any way, the timing is mainly determined by the position of the minimum. The events presented in Yao et al. were observed in the magnetosheath, and are thus very susceptible to errors, due to the turbulent nature of the surrounding plasma. Also, the small separation of the spacecraft makes the timing very sensitive to small-scale variation within the structure in their study. (This is the reason why we did not include time intervals with very small spacecraft separations in our statistical analysis.)

Yao, S. T., Hamrin, M., Shi, Q. Q., Yao, Z. H., Degeling, A. W., Zong, Q.-G., et al. [2020]. Propagating and dynamic properties of magnetic dips in the dayside magnetosheath: MMS observations. *Journal of Geophysical Research: Space Physics*, 125, e2019JA026736. <https://doi.org/10.1029/2019JA026736>

Line 24: "... These structures have no velocity in the plasma frame but are convected with..."

How does this statement fits with the goal of this paper? It looks like to be the answer to the open question identified in line 37: "An important open question regarding magnetic holes is determination of their velocities in the solar wind frame." Perhaps you can add

in line 24 that “some studies” have shown that MH are stationary in the plasma rest frame.

Here we refer to mirror modes. It is still not clear if Magnetic Holes (MHs) are remnants of mirror modes, and thus that is part of the objective of this paper. If MHs are convected with the solar wind, as our work suggests, it supports the theory that they are related to mirror modes.

Line 70: I suggest moving the discussion for magnetic hole event selection before discussing Figure 1. As it currently reads, it seems that the MH events are identified visually. We agree with the reviewer’s suggestion and we will move the discussion accordingly.

Line 77: The solar wind is a quasi-neutral flow. In the pristine solar wind, any real physical differences between electron and ion densities are immediately restored. As authors indicated the difference in measured densities are instrumental. However, the same plasma density should be used to calculate derived parameters, (i.e. Alfvén speed, etc.). Can you comment on why you introduce these different instruments, and which one is the ultimate source of the plasma density in the study? If the two measurements are complementary to give a better time resolution that should be stated in the text. We agree with this. In the updated manuscript, we will remove the ion measurements to avoid confusion since the electron density determined by the WHISPER instrument is generally considered to be quite reliable (e.g. Trotignon et al., 2001). WHISPER measurements were used for the calculation for the Alfvén velocity (line 56).

Also Line 77: “the latter being more reliable.”

This should probably be double checked. In Fig. 1, the electron density (black line) seems to be flat within the MHs, while ion densities increase, a typical signature in MHs. The discrepancy shown in Fig 1 is most likely due to the different time resolution between the density measurements/instruments.

Line 82-87: Was it also a requirement for all 4 s/c to show a similar magnetic depression levels? It is also possible that different s/c might cross different parts of the solenoid/cylindrical structure of the MH. Can you comment on that? It is not a requirement, however, the separation of the S/C in 2005 was typically small compared to the MHs. A few of the events have lower depression levels, suggesting that each S/C probes different parts of the MH. See figure 3 for S/C geometry related to structure. Investigating these types of crossing will be part of the continued work.

Line 96-97: “The plane perpendicular to ....” This sentence does not make sense as written. A plane cannot represent the field strength. Please rephrase. Yes, we realize that this was not very clear. We will rewrite it, so that it is clearer why the method described can be applied to cylindrical structures as well as planar. See response to reviewer 1.

Line 10137: Is  $t_{\alpha,\beta}$  influenced by the size of the averaging (sliding) window discussed in line 82? **The averaging is meant to improve the cross-correlation, as small-scale variations will not affect the result.**

Line 107: What were the conditions for cross-correlation? Please comment if you applied a certain threshold for the correlation. It would be interesting to see how this cross-correlation limits the number of events and/or the level of error in determining the velocity. A paragraph describing this would be a good addition to the paper and helps to justify the importance of your conclusions.

**The events chosen were completely isolated, and thus the cross correlation was always very high, ref. fig 1 and 3. We will add a sentence about this in the Method section.**

Line 135: The number of events seems very small to do a statistical analysis. Is it possible to extend the period of study? At a later phase of the mission, the s/c trajectories moved to cover the solar wind, and all 4 s/c were still able to measure the magnetic field. If lack of plasma measurements is an issue, one possibility is to use the shifted omni data, for instance, to determine the Alfvén speed. **We wanted the S/C separation large enough to obtain a well-defined timing result, but not large enough so that difference in minimum magnetic field strength is not too large.**

Line 163: What is the significance of the mean velocity in the timing frame? It depends on the solar wind velocity and normal direction. Related to this, can the authors comment whether based on this study, these structures are still to be considered pressure balanced? If there is a perceived velocity in the plasma rest frame, meaning that the structure either is lagging or pushing forward, should this also cause a sort of asymmetry between the leading and trailing boundaries?

**Our study gives a result on the velocity of the whole structure in the frame of the plasma. It is not clear that such a velocity (which we argue is consistent with zero) would affect the pressure balance. An asymmetry between the trailing and leading boundaries have not been considered in this study, but could of course conceivably affect the pressure balance. We believe such effects are more likely in the magnetosheath, where the pressure balance might be disturbed by the crossing of the bow shock. This will be the subject of a future study.**

Trotignon, J. G., Décréau, P. M. E., Rauch, J. L., Randriamboarison, O., Krasnoselskikh, V., Canu, P., ... & Ferreau, P. (2001, September). How to determine the thermal electron density and the magnetic field strength from the CLUSTER/WHISPER observations around the Earth. In *Annales Geophysicae* (Vol. 19, No. 10/12, pp. 1711-1720). Copernicus GmbH.
