# Supplementary material for: Velocity of magnetic holes in the solar wind from cluster multipoint measurements
Source: Copernicus journal article supplement (doi:10.5194/angeo-2023-5), 2023-02-24
Supplement: Supplementary file [file angeo-2023-5-RC1-supplement.pdf]

This simple and short paper deals with an important, and yet neglected (after 22 years of Cluster) topic, on whether magnetic holes are convected with the solar wind plasma or if they have an intrinsic velocity in the plasma frame. To do this the authors use the well-known timing-method by Harvey, which has proven itself well over the duration of the Cluster mission, on the magnetic field data. The solar wind velocity is taken from the CIS-CODIF/HIA instruments. The combination of the timing velocity and the solar wind velocity projected in the timing normal delivers then the hole-velocity in the plasma frame. Also, the Alfvén velocity is determined for each event, in order to check the possible creation of the holes. It is found that the magnetic holes are basically convected with the plasma flow and have only a small, sub-Alfvénic velocity in the plasma frame, where the error in the velocity is mainly determined by the error in the plasma instrument.

The paper is well-written, and the results are clear. However, there are a few minor points that should be checked:

- Page 2: Here the FGM is described and the text says that the full resolution of the instrument is 0.04 s, which would be roughly 25 Hz. However, the normal-mode of the Cluster FGM is 22 Hz. Then later on page 7 it is said that the error in the time is taken to be two data points, claimed to be  $\sim 0.09$  s, but that does not agree with the 0.04 s on page 3. Therefore, it is better to write the sampling frequency, mentioning the  $\sim 0.09$  s would then be okay.
- Page 3: “standard deviation” I think the authors have mixed up “low” and “high”. To use the std to filter out the “noise” the threshold has to be high enough (put infinity, no signal comes through), but it should be low enough to let the real signal (the MH) through.
- Figure 1: I think panel g is unnecessary, the location can be put into the caption.
- Page 4, line 90: (Horbury et al., 2004) LaTeX \citep should be \citet
- Page 4, line 93: “However, suppose ...”, I think it would be better to write “However, we suppose that ...”
- Page 4, line 96: “The plane perpendicular ...” I do not understand this sentence. Timing analysis assumes that the structure is a plane wave moving over the tetrahedron, and one gets the normal to this plane. How this is related to “minimum magnetic field strength” is unclear to me. Do the authors mix up here maybe minimum variance of the magnetic field?
- Page 4, Eq. 6: There is no upper limit for the summation, and there is an empty Eq. 8
- Page 5: (Wang et al., 2020) LaTeX \citep should be \citet
- Page 6, line 129: The authors use an angle of  $50^\circ$  for the split between linear and rotating magnetic holes and base that on Karlsson et al. (2021). However, looking at that paper I seem to find that there the distribution of rotation angles shows a (inverted) knee at roughly  $30^\circ$  (their figure 4 and equations 6 and 7). What is the reason for choosing this angle differently? Clearly, the distribution shown in Fig. 2c indicates a boundary at 50, but how should that be combined with earlier determined boundaries?
- Page 5, line 143: “the magnetic field direction”, I would add “background”
- Page 6, line 150: “to the high error” I would write “to the assumed high error”
- Page 7, line 189: “a factor of 2”, this is more than a factor of 3 (25/7.4)

- Table A1: This table give a lot of information that can be used. I would ask for an additional 2 columns, one with the Q-value of the tetrahedron (see Robert et al., 1998, in “Analysis Methods for Multi-Spacecraft Data”, Paschmann & Daly) and the angle of  $\mathbf{n}_{\text{timing}}$  and  $\mathbf{V}_{\text{sw}}$ . The former will show an indication of how well the timing analysis is done and the latter will (maybe) show that current sheets (strong rotational holes) have a normal more tilted wrt. the solar wind direction.
